# Supplementary material for: Chinese acupuncture: A potential treatment for autism rat model via improving synaptic function
Source: PubMed Central journal article supplement — Heliyon. 2024 Aug 29;10(17):e37130. doi: 10.1016/j.heliyon.2024.e37130 (PMC11402746; doi:10.1016/j.heliyon.2024.e37130), 2024-08-29
Supplement: mmc2.pdf [file mmc2.pdf]

附件

## 2021 – 2024年度福建省中医药科研项目计划

一、

| 项目编号       | 项目名称                                                 | 项目负责人 | 承担单位            | 起止年份      | 资助经费<br>(万元) |
|------------|------------------------------------------------------|-------|-----------------|-----------|--------------|
| 2021zyjc01 | 基于miR-92a-3p/SIRT1探讨泽泻汤对脑缺血再灌注损伤BMECs的保护机制           | 周阳杰   | 福建中医药大学康复医学院    | 2022-2024 | 10           |
| 2021zyjc02 | 补肾益髓方通过内质网-线粒体轴保护PD鼠DA能神经元的作用机制研究                    | 许茜    | 福建中医药大学中西医结合学院  | 2022-2024 | 10           |
| 2021zyjc03 | 姜黄素通过HMGB1-TLR4/NF- $\kappa$ B信号通路增强奥卡西平保护癫痫脑损伤的机制研究 | 方琼    | 福建省立医院          | 2022-2024 | 10           |
| 2021zyjc04 | 基于Ang/Tie信号通路探讨益景汤治疗早期糖尿病视网膜病变微血管损害的作用机制             | 任秉仪   | 福建中医药大学附属人民医院   | 2022-2024 | 10           |
| 2021zyjc05 | 基于BDNF/ERK/Bcl-2途径探讨松郁安神方对睡眠剥夺大鼠海马神经元损伤的保护机制         | 王秀峰   | 福建省中医药科学院       | 2022-2024 | 10           |
| 2021zyjc06 | 基于外泌体miRNAs研究血府逐瘀汤抑制动脉粥样硬化巨噬细胞泡沫化的作用机制               | 吴天敏   | 福建医科大学附属第一医院    | 2022-2024 | 10           |
| 2021zyjc07 | 基于星形胶质细胞介导的腺苷系统研究交泰丸治疗失眠的机制                          | 曾雪爱   | 福建省中医药科学院       | 2022-2024 | 10           |
| 2021zyjc08 | 凉血化瘀方对缺氧条件下HIF-1 $\alpha$ 介导的视网膜色素上皮细胞自噬的影响          | 胡艳红   | 福建中医药大学附属第二人民医院 | 2022-2024 | 10           |
| 2021zyjc09 | 细胞焦亡在慢性肾衰竭加速动脉粥样硬化进展的机制及黄芪甲苷干预研究                     | 林丽贞   | 福建医科大学附属第一医院    | 2022-2024 | 10           |

二、

| 项目编号       | 项目名称                                                  | 项目负责人 | 承担单位            | 起止年份      | 资助经费 |
|------------|-------------------------------------------------------|-------|-----------------|-----------|------|
| 2021zyjc10 | 八宝丹通过DDX20调控胃癌发展的分子机制研究                               | 池良杰   | 福建省立医院          | 2022-2024 | 10   |
| 2021zyjc11 | 胡翔龙经络学术思想研究                                           | 萨喆燕   | 福建省中医药科学院       | 2022-2024 | 10   |
| 2021zyjc12 | 基于NF-κB信号通路探讨麻荆止咳颗粒干预CVA气道炎症的机制研究                     | 卢峰    | 福建中医药大学附属第二人民医院 | 2022-2024 | 10   |
| 2021zyjc13 | 芩夏清热祛风颗粒对感染后咳嗽气道神经源性炎症的作用机制研究                         | 王世聪   | 福建中医药大学附属第二人民医院 | 2022-2024 | 10   |
| 2021zyjc14 | 基于泉州王氏中医痔科“从瘀论治痔病”的学术思想运用“化瘀二联法”治疗嵌顿痔的临床研究            | 王坚    | 泉州市中医院          | 2022-2024 | 5    |
| 2021zyjc15 | 名中医李学麟诊治小儿脑瘫经验总结                                      | 闫超    | 福建中医药大学附属人民医院   | 2022-2024 | 10   |
| 2021zyjc16 | 基于Th17/Treg/Cav-1/mir-146/Nrf2通路探讨全真一气汤对COPD大鼠的免疫调节机制 | 李希    | 福建中医药大学附属第二人民医院 | 2022-2024 | 10   |
| 2021zyjc17 | 基于数据挖掘探讨潘丽贞教授治疗不孕症经验及用药规律                             | 王英    | 福建省南平市人民医院      | 2022-2024 | 5    |

### 三、

| 项目编号       | 项目名称                                                | 项目负责人 | 承担单位            | 起止年份      | 资助经费(万元) |
|------------|-----------------------------------------------------|-------|-----------------|-----------|----------|
| 2021zyjc18 | ABC转运蛋白家族在电针治疗脑缺血再灌注大鼠认知障碍中的作用机制                    | 潘晓华   | 福建省中医药科学院       | 2022-2024 | 10       |
| 2021zyjc19 | 基于Beclin-1/LC3-II/p62自噬流探讨电针对缺血缺氧大鼠海马神经损伤的保护机制      | 刘威    | 福建中医药大学附属人民医院   | 2022-2024 | 10       |
| 2021zyjc20 | 从线粒体自噬--NLRP3炎性小体途径探讨电针治疗脑缺血再灌注损伤大鼠的作用机制            | 陈阿贞   | 福建中医药大学附属第二人民医院 | 2022-2024 | 10       |
| 2021zyjc21 | 基于正交设计探讨续苓健骨方治疗骨质疏松模型大鼠的组方优化研究                      | 陈赛楠   | 福建省中医药科学院       | 2022-2024 | 10       |
| 2021zyjc22 | 经皮穴位电刺激对MCAO大鼠脑内p38MAPK信号通路影响的实验研究                  | 庄玲玲   | 福建中医药大学附属人民医院   | 2022-2024 | 10       |
| 2021zyjc23 | 电针对SAMP8小鼠补体C1q依赖的小胶质细胞吞噬突触的影响                      | 郭婉清   | 福建中医药大学附属第三人民医院 | 2022-2024 | 10       |
| 2021zyjc24 | 基于miR-146a调控TRAF6/c-Src/PI3K信号通路探讨青娥方抑制破骨细胞骨吸收的作用机制 | 郭世明   | 福建省漳州市中医院       | 2022-2024 | 10       |
| 2021zyjc25 | 基于Nrf2/Keap1/ARE信号通路探讨复方杜仲汤对大鼠椎间盘软骨终板退变的机制研究        | 王庆敏   | 福建省漳州市中医院       | 2022-2024 | 10       |
| 2021zyjc26 | “靳三针”调控催产素及其受体在孤独症刻板行为中作用机制的研究                      | 黄龙生   | 福建省妇幼保健院        | 2022-2024 | 10       |

#### 四、

| 项目编号       | 项目名称                                               | 项目负责人 | 承担单位                      | 起止年份      | 资助经费<br>(万元) | 备注        |
|------------|----------------------------------------------------|-------|---------------------------|-----------|--------------|-----------|
| 2021zy1c27 | 从蛋白质氧化修饰与AKT磷酸化信号串扰探讨薯蕷粥对妊娠糖尿病氧化应激网络的作用机制          | 葛莉    | 福建中医药大学护理学院               | 2022-2024 | 10           |           |
| 2021zy1c28 | 益肾降糖饮治疗气阴两虚型糖尿病肾病(G3A3期)患者临床观察及对血清半乳糖凝集素-3的影响      | 丘余良   | 福建中医药大学附属人民医院             | 2022-2024 | 10           |           |
| 2021zy1c29 | 基于 <sup>1</sup> H-NMR代谢组学方法探讨T2DM中湿热证候动态代谢特征       | 陈学勤   | 厦门大学附属第一医院                | 2022-2024 | 10           | 由厦门市卫健委资助 |
| 2021zy1c30 | miRNA-206介导PI3K/AKT信号通路调控海马-前额叶皮层环路在太极拳对轻度认知障碍量效关系 | 刘娇    | 福建中医药大学康复医疗技术国家地方联合工程研究中心 | 2022-2024 | 10           |           |
| 2021zy1c31 | 黄芪甲甘与苦参碱配伍在重塑肺癌肿瘤微环境中的作用                           | 林兴    | 福建省立医院                    | 2022-2024 | 10           |           |
| 2021zy1c32 | 补虚平喘膏联合呼吸训练对慢性阻塞性肺疾病稳定期本虚证患者膈肌功能的影响                | 徐顺贵   | 福建中医药大学附属人民医院             | 2022-2024 | 10           |           |
| 2021zy1c33 | 苡蓉舒痉颗粒干预帕金森病模型小鼠中脑DJ-1的作用研究                        | 肖绍坚   | 福建中医药大学附属第三人民医院           | 2022-2024 | 10           |           |
| 2021zy1c34 | 清眩降压汤对肝阳上亢型高血压病并轻度失眠患者的临床研究                        | 黄琼    | 福建中医药大学附属第三人民医院           | 2022-2024 | 10           |           |
| 2021zy1c35 | 扶阳通络方治疗中风后肌痉挛(脾肾阳虚型)疗效与机制及对Gly、GABA水平的影响           | 许翊坂   | 福建省南平市人民医院                | 2022-2024 | 10           |           |
| 2021zy1c36 | 基于BDNF通路及磁共振DTI成像探讨化痰通络汤治疗痰瘀阻络型卒中后认知功能障碍的研究        | 杨洋    | 福建中医药大学附属人民医院             | 2022-2024 | 10           |           |
| 2021zy1c37 | 天王补心丹通过调节下丘脑生物钟反馈环路治疗心阴虚证失眠的机制研究                   | 尹鹭峰   | 福建中医药大学附属第三人民医院           | 2022-2024 | 10           |           |
| 2021zy1c38 | 中医穴位贴敷联合三球式呼吸训练对慢性阻塞性肺病稳定期临床应用分析                   | 王彬    | 福鼎市医院                     | 2022-2024 | 10           |           |

## 五、

| 项目编号       | 项目名称                                        | 项目负责人 | 承担单位            | 起止年份      | 资助经费<br>(万元) |
|------------|---------------------------------------------|-------|-----------------|-----------|--------------|
| 2021zylc39 | 朱氏“去疣方”通过TRIM21/pRb通路抑制H8细胞增殖的机制研究          | 黄山    | 福建省妇幼保健院        | 2022-2024 | 10           |
| 2021zylc40 | 基于胃动力学耳穴压豆改善子宫肌瘤腹腔镜术后患者腹胀的疗效机制研究            | 黄锦华   | 福建中医药大学附属人民医院   | 2022-2024 | 10           |
| 2021zylc41 | 金茵退黄颗粒治疗乙型肝炎病毒相关慢加急性肝衰竭的作用及机制研究             | 洪美珠   | 福建医科大学孟超肝胆医院    | 2022-2024 | 10           |
| 2021zylc42 | 基于“脾主肌肉”理论探讨脾虚对绝经后骨质疏松症患者肌力及平衡功能的影响         | 李生强   | 福建省中医药科学院       | 2022-2024 | 10           |
| 2021zylc43 | 健身六字诀联合孙氏定痛汤治疗女大学生血瘀型原发性痛经临床观察              | 李健    | 福州市中医院          | 2022-2024 | 10           |
| 2021zylc44 | 基于脾主肌肉理论通便灵治疗气虚型慢传输型便秘的临床研究                 | 骆云丰   | 福建中医药大学附属第二人民医院 | 2022-2024 | 10           |
| 2021zylc45 | 香砂六君子汤加减治疗脾虚气滞型餐后不适综合征的疗效观察及其对近端胃容受性舒张功能的影响 | 黄泽辉   | 福建省漳州市中医院       | 2022-2024 | 10           |
| 2021zylc46 | 基于远红外热技术对更年期肝郁化火型不寐病患者“两胁不适”的机理研究           | 温立新   | 三明市中西医结合医院      | 2022-2024 | 7            |
| 2021zylc47 | 六经辨治胃食管反流病的临床研究                             | 范文东   | 龙岩市中医院          | 2022-2024 | 10           |
| 2021zylc48 | 基于VIP、NO神经递质探讨六君子汤加减治疗食管癌术后反流机制研究           | 黄志军   | 福建医科大学附属第二医院    | 2022-2024 | 10           |

## 六、

| 项目编号       | 项目名称                                  | 项目负责人 | 承担单位           | 起止年份      | 资助经费(万元) | 备注        |
|------------|---------------------------------------|-------|----------------|-----------|----------|-----------|
| 2021zy1c49 | 基于肌骨超声探讨电针居髃穴对中风后臀中肌及下肢运动功能的影响        | 杨冬岚   | 泉州市中医院         | 2022-2024 | 8.3      |           |
| 2021zy1c50 | 基于经筋理论从髌股关节力学角度探索针刀改善早期膝骨关节炎下肢功能障碍的作用 | 曾维铨   | 福建中医药大学附属康复医院  | 2022-2024 | 10       |           |
| 2021zy1c51 | 力敏腧穴理论指导下小针刀治疗腰背部肌筋膜疼痛综合征的临床应用研究      | 李泰标   | 厦门市第五医院        | 2022-2024 | 10       | 由厦门市卫健委资助 |
| 2021zy1c52 | 补肾壮筋汤调节BMSC归巢软骨抑制骨关节炎筋骨失养的机制研究        | 李西海   | 福建中医药大学中西医结合学院 | 2022-2024 | 10       |           |
| 2021zy1c53 | 针药并用健脾通腑法干预急性胰腺炎早期肠内营养实施的临床研究         | 陈名智   | 晋江市中医院         | 2022-2024 | 6        |           |
| 2021zy1c54 | 泉州正骨托头手法治疗颈椎小关节紊乱的临床观察                | 陈长贤   | 泉州市正骨医院        | 2022-2024 | 5        |           |
| 2021zy1c55 | 基于头颅弥散张量成像技术探讨针灸干预梗死后肢体功能障碍临床研究       | 吴文宝   | 福建省龙岩市第一医院     | 2022-2024 | 10       |           |
| 2021zy1c56 | 基于肌骨超声评价改良式南少林站桩功配合针刀解筋结治疗膝骨关节炎的临床研究  | 陈祥    | 福建省老年医院        | 2022-2024 | 5        |           |
| 2021zy1c57 | 痰证积分与特应性皮炎相关性的研究                      | 张强    | 福建省龙岩市第一医院     | 2022-2024 | 10       |           |

## 七、

| 项目编号       | 项目名称                             | 项目负责人 | 承担单位         | 起止年份      | 资助经费<br>(万元) | 备注   |
|------------|----------------------------------|-------|--------------|-----------|--------------|------|
| 2021zyyj58 | 基于肾有实证理论探讨泽泻“泻肾浊”配伍防治绝经后骨质疏松症的作用 | 吴水生   | 福建中医药大学药学院   | 2022-2024 | 10           |      |
| 2021zyyj59 | 基于互联网-云技术的金线莲品质快速评价体系构建与应用       | 张勋    | 福建中医药大学药学院   | 2022-2024 | 10           |      |
| 2021zyyj60 | 传统制剂滑膜灵颗粒的工艺改良及质量标准提升研究          | 王建荣   | 福州市第二医院      | 2022-2024 | 10           |      |
| 2021zyyj61 | 太子参-辣椒轮作对太子参种植及土壤环境影响            | 赵立    | 福建省中医药科学院    | 2022-2024 | 10           |      |
| 2021zyyj62 | 畚药“十二时辰”外用治疗类风湿关节炎的抗炎镇痛药效活性部位筛选  | 韩静    | 福建省中医药科学院    | 2022-2024 | 10           |      |
| 2021zyyj63 | 基于第四次全国中药资源普查数据的福建省中药资源区划研究      | 杨成梓   | 福建中医药大学药学院   | 2022-2024 | 10           |      |
| 2021zyyj64 | 畚药乌饭树不同提取物的抑菌活性及其初步的机制研究         | 周春权   | 福建省中医药科学院    | 2022-2024 | 10           |      |
| 2021zyyj65 | 复方金线莲胶囊的研发                       | 黄德福   | 福建医科大学孟超肝胆医院 | 2022-2024 | 10           |      |
| 2021zyyj66 | “守正代茶饮”的开发应用研究                   | 李朝晖   | 安溪县中医院       | 2022-2024 | 10           | 单位自筹 |

## 八、

| 项目编号       | 项目名称                                                    | 项目负责人 | 承担单位            | 起止年份      | 资助经费<br>(万元) | 备注           |
|------------|---------------------------------------------------------|-------|-----------------|-----------|--------------|--------------|
| 2021zyyj67 | 半夏秫米汤通过调节GLU/GABA递质失衡改善睡眠的机制研究                          | 黄枚    | 福建中医药大学药学院      | 2022-2024 | 10           |              |
| 2021zyyj68 | 华蟾素通过促进miR-5688干扰鼻咽癌细胞EMT信号及肿瘤干性抑制肿瘤增殖、迁移、侵袭能力的研究       | 刘晨    | 福建医科大学附属第一医院    | 2022-2024 | 10           |              |
| 2021zyyj69 | 基于SIRT3-NF $\kappa$ B调控小胶质细胞活化探讨泽泻醇A改善高脂诱导BBB损伤的机制研究    | 薛偕华   | 福建中医药大学附属康复医院   | 2022-2024 | 10           |              |
| 2021zyyj70 | 二氧化硅载体增强黄药子主要成分黄独素B的抗胃癌效应及其机制                           | 卢毅卓   | 厦门大学附属中山医院      | 2022-2024 | 10           | 由厦门市<br>卫健委资 |
| 2021zyyj71 | 建泽泻三萜成分生物合成关键CYP450s基因的研究                               | 林文津   | 福建省医学科学研究院      | 2022-2024 | 10           |              |
| 2021zyyj72 | 菟丝子多糖对多囊卵巢综合征伴胰岛素抵抗的机制研究                                | 欧余航   | 福建中医药大学附属第三人民医院 | 2022-2024 | 10           |              |
| 2021zyyj73 | 原苏木素B促进结肠癌细胞对铂类化疗敏感性的机制研究                               | 洪钟时   | 福建医科大学附属第二医院    | 2022-2024 | 10           |              |
| 2021zyyj74 | 黄芩苷对大肠癌细胞生长的影响及PN01的调控作用                                | 陈鑫宇   | 三明市中西医结合医院      | 2022-2024 | 10           |              |
| 2021zyyj75 | 基于IL-17/NF- $\kappa$ B信号通路探索雷公藤多苷和姜黄素配伍治疗类风湿性关节炎的减毒增效机制 | 张超凤   | 莆田学院附属医院        | 2022-2024 | 10           |              |



## 九、

| 项目编号       | 项目名称                                      | 项目负责人 | 承担单位            | 起止年份      | 资助经费<br>(万元) | 备注           |
|------------|-------------------------------------------|-------|-----------------|-----------|--------------|--------------|
| 2021zyg176 | 新时代下福建省三甲中医院临床科研复合型人才评价与应用研究              | 蔡昭莲   | 福建中医药大学附属人民医院   | 2022-2024 | 10           |              |
| 2021zyg177 | 福建省中医学术流派专项资金绩效评价分析                       | 林燕    | 福建中医药大学附属人民医院   | 2022-2024 | 10           |              |
| 2021zyg178 | 厦门市三级综合医院中医发展现状调查和发展对策研究                  | 赵能江   | 厦门大学附属第一医院      | 2022-2024 | 10           | 由厦门市<br>卫健委资 |
| 2021zyg179 | “府院共建新模式”下，探索综合性医院中医科和基层中医院共同高质量发展的道路     | 朱明    | 福建医科大学附属第一医院    | 2022-2024 | 10           |              |
| 2021zyg180 | 福建省中医药专项资金绩效评价的研究与探讨                      | 林航    | 福建中医药大学附属第二人民医院 | 2022-2024 | 10           |              |
| 2021zyg181 | 精细化运营管理对提高中医药专项资金使用效率评价研究                 | 黄冠伟   | 厦门市中医院          | 2022-2024 | 10           | 由厦门市<br>卫健委资 |
| 2021zyg182 | 以中西医协同发展为导向的综合医院中医科发展模式的探索与实践             | 林妙阔   | 福州市第二医院         | 2022-2024 | 4            |              |
| 2021zyg183 | 福建省非中医类医院中医药发展政策研究                        | 谢小清   | 福建中医药大学附属人民医院   | 2022-2024 | 10           |              |
| 2021zyg184 | 福建省公立医院中医临床人才分层评价指标体系的构建研究                | 黄莹    | 福建中医药大学附属康复医院   | 2022-2024 | 10           |              |
| 2021zyg185 | 现代医院管理制度试点医院中医药人才评价指标体系研究                 | 林瑜    | 厦门市中医院          | 2022-2024 | 10           | 由厦门市<br>卫健委资 |
| 2021zyg186 | 基于米特-霍恩模型的福建省综合医院中医科在中医药特色发展医养健康领域的政策执行分析 | 贺春兰   | 福建中医药大学附属康复医院   | 2022-2024 | 10           |              |
| 2021zyg187 | 关于临床中医师评价模型的研究                            | 林超    | 福建中医药大学附属第三人民医院 | 2022-2024 | 10           |              |

# 福建省卫生健康委员会

---

闽卫中医函〔2021〕969号

## 福建省卫生健康委员会关于下达2021—2024年度 省中医药科研项目计划的通知

各设区市卫健委、平潭综合实验区社会事业局，委直属各单位，福建医科大学、中医药大学及其各附属医院，省中医药科学院：

现将《2021—2024年度福建省中医药科研项目计划》下达给你们，共立项87项，其中省级资助80项、厦门市卫健委资助6项、单位自筹1项。请各课题承担单位根据计划抓紧落实，保证课题的顺利实施。省卫健委委托省中医药科学院开展课题日常管理，请各地各单位参照《福建省卫生健康科技计划项目管理暂行办法》和《福建省卫生健康科技计划项目实施方案》，切实加强项目实施和经费使用的监督管理，为各项目的实施提供支持和保障，确保各项目按计划顺利实施。

附件：2021—2024年度福建省中医药科研项目计划

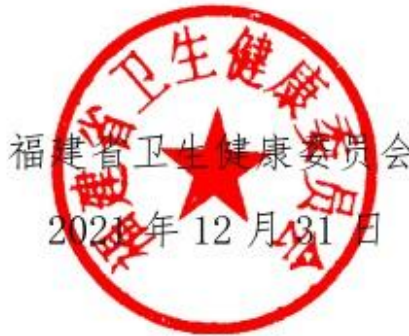

（此件主动公开）

---

appendix

## 2021-2024 Fujian Provincial Traditional Chinese Medicine Scientific Research Project Plan

one,

| project number | project name                                                                                                                                | project leader | Undertake unit                                                                                                            | Start and end year | Funding fund (RMB ten thousand yuan) |
|----------------|---------------------------------------------------------------------------------------------------------------------------------------------|----------------|---------------------------------------------------------------------------------------------------------------------------|--------------------|--------------------------------------|
| 2021zyjc 01    | To explore the protection mechanism of miR-92a-and diarrhea soup against BMECs of cerebral ischemia-reperfusion injury based on 3p / SIRT 1 | Zhou Yangjie   | School of Rehabilitation Medicine, Fujian University of Traditional Chinese Medicine                                      | 2022-2024          | 10                                   |
| 2021zyjc 02    | Protection of DA neurons through the endoplasmic reticulum-mitochondrial axis                                                               | Xu Qian        | School of Integrated Traditional Chinese Medicine and Western Medicine, Fujian University of Traditional Chinese Medicine | 2022-2024          | 10                                   |
| 2021zyjc 03    | Mechanism of occarbepine protection against epileptic brain injury through HMGB 1-TLR 4 / NF- $\kappa$ B signaling pathway                  | Fang Qiong     | Fujian Provincial Hospital                                                                                                | 2022-2024          | 10                                   |

|             |                                                                                                                                            |               |                                                                                              |           |    |
|-------------|--------------------------------------------------------------------------------------------------------------------------------------------|---------------|----------------------------------------------------------------------------------------------|-----------|----|
| 2021zyjc 04 | To explore the mechanism of Yijing decoction for microvascular damage in early diabetic retinopathy based on Ang / Tie signaling pathway   | Ren Bingyi    | The Affiliated People's Hospital of Fujian University of Traditional Chinese Medicine        | 2022-2024 | 10 |
| 2021zyjc 05 | To explore the protective mechanism of sleep-deprived rats based on the BDNF / ERK / Bcl-2 pathway                                         | Xiu-feng wang | Fujian Academy of Traditional Chinese Medicine                                               | 2022-2024 | 10 |
| 2021zyjc 06 | Based on miRNAs to study the mechanism of foamy of atherosclerotic macrophages                                                             | Wu Tianmin    | The First Affiliated Hospital of Fujian Medical University                                   | 2022-2024 | 10 |
| 2021zyjc 07 | Based on astrocyte-mediated adenosine system to study the mechanism of insomnia                                                            | Zeng Xue love | Fujian Academy of Traditional Chinese Medicine                                               | 2022-2024 | 10 |
| 2021zyjc 08 | Effect of cooling blood stasis formula on HIF-1 $\alpha$ - mediated autophagy in retinal pigment epithelial cells under hypoxic conditions | Hu Yanhong    | The Second People's Hospital Affiliated to Fujian University of Traditional Chinese Medicine | 2022-2024 | 10 |
| 2021zyjc 09 | The mechanism of pyroptosis in chronic renal failure and astragaloside intervention                                                        | Lin Lizhen    | The First Affiliated Hospital of Fujian Medical University                                   | 2022-2024 | 10 |

## 2.

| project number | project name                                                                                                                           | project leader | Undertake unit                                                                               | Start and end year | Funding |
|----------------|----------------------------------------------------------------------------------------------------------------------------------------|----------------|----------------------------------------------------------------------------------------------|--------------------|---------|
| 2021zyjc 10    | Molecular mechanism of gastric cancer development by DDX 20                                                                            | Chi Liangjie   | Fujian Provincial Hospital                                                                   | 2022-2024          | 10      |
| 2021zyjc 11    | Research on academic thought                                                                                                           | Sa zhe yan     | Fujian Academy of Traditional Chinese Medicine                                               | 2022-2024          | 10      |
| 2021zyjc 12    | Study on the mechanism of airway inflammation based on NF- $\kappa$ B signaling pathway                                                | Lu Feng        | The Second People's Hospital Affiliated to Fujian University of Traditional Chinese Medicine | 2022-2024          | 10      |
| 2021zyjc 13    | Study on the mechanism of neurogenic inflammation of cough airway after infection                                                      | Wang Shicong   | The Second People's Hospital Affiliated to Fujian University of Traditional Chinese Medicine | 2022-2024          | 10      |
| 2021zyjc 14    | Based on the academic thought of "treating hemorrhoids disease from blood stasis" in the department of Quanzhou Wang's TCM hemorrhoids | Wang Jian      | Quanzhou City Hospital of Traditional Chinese Medicine                                       | 2022-2024          | 5       |
| 2021zyjc 15    | Traditional Chinese medicine Li Xuelin diagnosis and treatment of children with cerebral palsy experience summary                      | Yan Chao       | The Affiliated People's Hospital of Fujian University of Traditional                         | 2022-2024          | 10      |

|             |                                                                                                             |           | Chinese Medicine                                                                             |           |    |
|-------------|-------------------------------------------------------------------------------------------------------------|-----------|----------------------------------------------------------------------------------------------|-----------|----|
| 2021zyjc 16 | Exploring the mechanism of COPD rats / Th 17 / Treg / Cav-1 / ir-146 / Nrf 2 pathway                        | Li Xi     | The Second People's Hospital Affiliated to Fujian University of Traditional Chinese Medicine | 2022-2024 | 10 |
| 2021zyjc 17 | Discuss Professor Pan Lizhen's experience of infertility treatment and medication rule based on data mining | Wang Ying | Nanping People's Hospital of Fujian Province                                                 | 2022-2024 | 5  |

three,

| project number | project name                                                                                                                                                      | project leader  | Undertake unit                                                                               | Start and end year | Funding fund (RMB ten thousand yuan) |
|----------------|-------------------------------------------------------------------------------------------------------------------------------------------------------------------|-----------------|----------------------------------------------------------------------------------------------|--------------------|--------------------------------------|
| 2021zyjc 18    | Mechanisms of the ABC family of transporters in electroacupuncture treatment of cognitive impairment in cerebral ischemia-reperfusion rats                        | Xiao-hua pan    | Fujian Academy of Traditional Chinese Medicine                                               | 2022-2024          | 10                                   |
| 2021zyjc 19    | To explore the mechanism of electrical protection against hippocampal nerve injury in ischemic and hypoxic rats based on Beclin-1 / LC 3-II / p 62 autophagy flow | Wei Liu         | The Affiliated People's Hospital of Fujian University of Traditional Chinese Medicine        | 2022-2024          | 10                                   |
| 2021zyjc 20    | To investigate the mechanism of electroacupuncture in rats with cerebral ischemia-reperfusion injury from mitophagy-NLRP 3 inflammasome pathway                   | Chen Ah zhen    | The Second People's Hospital Affiliated to Fujian University of Traditional Chinese Medicine | 2022-2024          | 10                                   |
| 2021zyjc 21    | Study on the optimization of bone bone bone bone bone rats                                                                                                        | Chen Sainan     | Fujian Academy of Traditional Chinese Medicine                                               | 2022-2024          | 10                                   |
| 2021zyjc 22    | Experimental study on the effect of percutaneous acupoint electrical stimulation on p 38MAPK signaling pathway in MCAO, rat brain                                 | Zhuang Lingling | The Affiliated People's Hospital of Fujian University of Traditional Chinese Medicine        | 2022-2024          | 10                                   |
| 2021zyjc 23    | Effect of electrical targeting of complement C 1q-dependent phagocytosis by microglia in SAMP 8                                                                   | Wan-qing        | The Third People's Hospital Affiliated to Fujian                                             | 2022-2024          | 10                                   |

|             |                                                                                                                                      |                 |                                                                          |           |    |
|-------------|--------------------------------------------------------------------------------------------------------------------------------------|-----------------|--------------------------------------------------------------------------|-----------|----|
|             | mice                                                                                                                                 | guo             | University of Traditional Chinese Medicine                               |           |    |
| 2021zyjc 24 | Based on the regulation of TRAF 6 / c-Src / PI 3K signaling pathway based on miR-146a                                                | Guo Shiming     | Fujian Province, Zhangzhou City Hospital of Traditional Chinese Medicine | 2022-2024 | 10 |
| 2021zyjc 25 | Study on the mechanism of endplate degeneration of rat intervertebral disc cartilage based on Nrf 2 / Keap 1 / ARE signaling pathway | Wang Qingmin    | Fujian Province, Zhangzhou City Hospital of Traditional Chinese Medicine | 2022-2024 | 10 |
| 2021zyjc 26 | Jin Sanpin regulates oxytocin and its receptors in autism                                                                            | Huang Longsheng | Fujian Provincial Maternal and Child Health Care Hospital                | 2022-2024 | 10 |



four,

| project number | project name                                                                                                                                                               | project leader | Undertake unit                                                                                                                        | Start and end year | Funding fund (RMB ten thousand yuan) | remarks                                                       |
|----------------|----------------------------------------------------------------------------------------------------------------------------------------------------------------------------|----------------|---------------------------------------------------------------------------------------------------------------------------------------|--------------------|--------------------------------------|---------------------------------------------------------------|
| 2021zylc 27    | To investigate the mechanism of potato porridge on oxidative stress network from protein oxidative modification and AKT phosphorylation signal crosstalk                   | Glee           | School of Nursing, Fujian University of Traditional Chinese Medicine                                                                  | 2022-2024          | 10                                   |                                                               |
| 2021zylc 28    | Treatment of qi Yin deficiency type diabetic nephropathy (Stage G 3A 3) Clinical observation and effects on serum galactectin-3                                            | Qiu Yulian g   | The Affiliated People's Hospital of Fujian University of Traditional Chinese Medicine                                                 | 2022-2024          | 10                                   |                                                               |
| 2021zylc 29    | Exploring the dynamic metabolic characteristics of damp heat syndrome in T 2DM based on 1H-NMR metabolomics method                                                         | Chen Xueqin    | The First Affiliated Hospital of Xiamen University                                                                                    | 2022-2024          | 10                                   | <b>Is supported by the Xiamen Municipal Health Commission</b> |
| 2021zylc 30    | miRNA-206 mediates PI 3K / AKT signaling pathway regulation of hippocampal-prefrontal cortex loop in Tai Chi magnitude-efficacy relationship for mild cognitive impairment | Liu Jiao       | National and Local Joint Engineering Research Center of Rehabilitation Medical Technology of Fujian University of Traditional Chinese | 2022-2024          | 10                                   |                                                               |

|                |                                                                                                                                     |               | Medicine                                                                                    |           |    |  |
|----------------|-------------------------------------------------------------------------------------------------------------------------------------|---------------|---------------------------------------------------------------------------------------------|-----------|----|--|
| 2021zylc<br>31 | Association of Astragalus ethylene and matrine in reshaping the tumor microenvironment of lung cancer                               | Lin Xing      | Fujian Provincial Hospital                                                                  | 2022-2024 | 10 |  |
| 2021zylc<br>32 | Effect of tonic deficiency and respiratory training on diaphragm function in patients with chronic obstructive pulmonary disease    | Xu Shungui    | The Affiliated People's Hospital of Fujian University of Traditional Chinese Medicine       | 2022-2024 | 10 |  |
| 2021zylc<br>33 | Effect of DJ-1 in Parkinson's disease model                                                                                         | Xiao Shaojian | The Third People's Hospital Affiliated to Fujian University of Traditional Chinese Medicine | 2022-2024 | 10 |  |
| 2021zylc<br>34 | Clinical study of patients with hypertension and mild insomnia                                                                      | Huang Qiong   | The Third People's Hospital Affiliated to Fujian University of Traditional Chinese Medicine | 2022-2024 | 10 |  |
| 2021zylc<br>35 | Efficacy and mechanism of treating muscle spasm (spleen and kidney Yang deficiency) and its effect on Gly and GABA                  | Xu yiban      | Nanping People's Hospital of Fujian Province                                                | 2022-2024 | 10 |  |
| 2021zylc<br>36 | Study on the treatment of cognitive dysfunction after sputum stasis stroke based on BDNF pathway and magnetic resonance DTI imaging | Yang Yang     | The Affiliated People's Hospital of Fujian University of Traditional Chinese Medicine       | 2022-2024 | 10 |  |
| 2021zylc<br>37 | Study on the mechanism of heart Yin deficiency by regulating hypothalamic clock feedback loop                                       | Yin Lufeng    | The Third People's Hospital Affiliated to Fujian University of Traditional Chinese Medicine | 2022-2024 | 10 |  |
| 2021zylc<br>38 | Analysis of clinical application of TCM acupoint application combined with three-ball breathing training in                         | Wang Bin      | Fuding City Hospital                                                                        | 2022-2024 | 10 |  |

|  |                                       |  |  |  |  |  |
|--|---------------------------------------|--|--|--|--|--|
|  | chronic obstructive pulmonary disease |  |  |  |  |  |
|--|---------------------------------------|--|--|--|--|--|

five,

| project number | project name                                                                                                                                                              | project leader | Undertake unit                                                                               | Start and end year | Funding fund (RMB ten thousand yuan) |
|----------------|---------------------------------------------------------------------------------------------------------------------------------------------------------------------------|----------------|----------------------------------------------------------------------------------------------|--------------------|--------------------------------------|
| 2021zylc 39    | Zhu's "dewart square" inhibited H 8 cell proliferation through the TRIM 21 / pRb pathway                                                                                  | Mount Huang    | Fujian Provincial Maternal and Child Health Care Hospital                                    | 2022-2024          | 10                                   |
| 2021zylc 40    | Study on the efficacy mechanism of improving abdominal distension in patients after laparoscopy for uterine fibroids based on gastric dynamics                            | Huang Jinhua   | The Affiliated People's Hospital of Fujian University of Traditional Chinese Medicine        | 2022-2024          | 10                                   |
| 2021zylc 41    | Effect and mechanism of hepatitis B virus related slow and acute liver failure                                                                                            | HongMeiZhu     | Meng Chao Hepatobiliary Hospital of Fujian Medical University                                | 2022-2024          | 10                                   |
| 2021zylc 42    | Based on the theory of "spleen master muscle", to explore the effect of spleen deficiency on muscle strength and balance function in postmenopausal osteoporosis patients | Li Shengqiang  | Fujian Academy of Traditional Chinese Medicine                                               | 2022-2024          | 10                                   |
| 2021zylc 43    | Clinical observation of primary dysmenorrhea in female college students                                                                                                   | Li Jian        | Fuzhou Hospital of Traditional Chinese Medicine                                              | 2022-2024          | 10                                   |
| 2021zylc 44    | Clinical study on the treatment of chronic transit constipation based on spleen master muscle                                                                             | Luo Yunfeng    | The Second People's Hospital Affiliated to Fujian University of Traditional Chinese Medicine | 2022-2024          | 10                                   |

|             |                                                                                                                           |                  |                                                                              |           |    |
|-------------|---------------------------------------------------------------------------------------------------------------------------|------------------|------------------------------------------------------------------------------|-----------|----|
| 2021zylc 45 | The curative effect of postprandial discomfort syndrome and its effect on proximal gastric receptivity diastolic function | Huang Zehui      | Fujian Province, Zhangzhou City Hospital of Traditional Chinese Medicine     | 2022-2024 | 10 |
| 2021zylc 46 | Research on the mechanism of "two-side discomfort" in menopausal patients based on far infrared heat technology           | Wen Lixin        | Sanming City Hospital of Integrated Traditional Chinese and Western Medicine | 2022-2024 | 7  |
| 2021zylc 47 | 6. Clinical study on the treatment of gastroesophageal reflux disease                                                     | Model essay east | Longyan City Hospital of Traditional Chinese Medicine                        | 2022-2024 | 10 |
| 2021zylc 48 | Study on the mechanism of reflux after the treatment of esophageal cancer based on VIP and NO neurotransmitters           | Huang Zhijun     | The Second Affiliated Hospital of Fujian Medical University                  | 2022-2024 | 10 |

six,

| project number | project name                                                                                                                                | project leader | Undertake unit                                                                                                   | Start and end year | Funding fund (RMB ten thousand yuan) | remarks                                      |
|----------------|---------------------------------------------------------------------------------------------------------------------------------------------|----------------|------------------------------------------------------------------------------------------------------------------|--------------------|--------------------------------------|----------------------------------------------|
| 2021zylc 49    | The effect of electric acupuncture on the motor function of gluteus medius and lower limbs after stroke based on myoskeletal ultrasound     | Yang Donglan   | Quanzhou City Hospital of Traditional Chinese Medicine                                                           | 2022-2024          | 8.3                                  |                                              |
| 2021zylc 50    | To explore the role of needle knife in improving the lower limb dysfunction of early knee osteoarthritis                                    | Zeng Weiquan   | The Affiliated Rehabilitation Hospital of Fujian University of Traditional Chinese Medicine                      | 2022-2024          | 10                                   |                                              |
| 2021zylc 51    | Research on the clinical application of small needle knife in treating myofascial pain syndrome under the guidance of Limin acupoint theory | Li Taibiao     | Xiamen Fifth Hospital                                                                                            | 2022-2024          | 10                                   | <b>By Xiamen city Health commission help</b> |
| 2021zylc 52    | Study on the mechanism of regulating BMSC homing cartilage                                                                                  | Li Xihai       | School of Integrated Traditional Chinese Medicine and Western Medicine, Fujian University of Traditional Chinese | 2022-2024          | 10                                   |                                              |

|             |                                                                                                                     |                  |                                                        |           |    |  |
|-------------|---------------------------------------------------------------------------------------------------------------------|------------------|--------------------------------------------------------|-----------|----|--|
|             |                                                                                                                     |                  | Medicine                                               |           |    |  |
| 2021zylc 53 | Clinical study on the implementation of enteral nutrition in acute pancreatitis with injection and spleen method    | Chen Mingzhi     | Jinjiang City Hospital of Traditional Chinese Medicine | 2022-2024 | 6  |  |
| 2021zylc 54 | Clinical observation of cervical facet joint disorder in Quanzhou                                                   | Chang-Xi'an Chen | Quanzhou Bone-setting Hospital                         | 2022-2024 | 5  |  |
| 2021zylc 55 | Clinical study on acupuncture intervention after infarction limb dysfunction based on head diffusion tensor imaging | Wu Wenbao        | Longyan City First Hospital of Fujian Province         | 2022-2024 | 10 |  |
| 2021zylc 56 | Clinical study on the treatment of knee osteoarthritis based modified of knee osteoarthritis                        | Chen Xiang       | Fujian Provincial Geriatric Hospital                   | 2022-2024 | 5  |  |
| 2021zylc 57 | Study on the correlation between sputum syndrome integral and atopic dermatitis                                     | Zhang Qiang      | Longyan City First Hospital of Fujian Province         | 2022-2024 | 10 |  |

seven,

| project number | project name                                                                                                                     | project leader | Undertake unit                                                        | Start and end year | Funding fund (RMB ten thousand yuan) | remarks |
|----------------|----------------------------------------------------------------------------------------------------------------------------------|----------------|-----------------------------------------------------------------------|--------------------|--------------------------------------|---------|
| 2021zyyj58     | Based on the empirical theory of kidney, the effect of the disease in postmenopausal osteoporosis                                | Wu aquatic     | School of Pharmacy, Fujian University of Traditional Chinese Medicine | 2022-2024          | 10                                   |         |
| 2021zyyj59     | Construction and application of rapid evaluation system of golden lotus quality based on Internet-cloud technology               | Zhang Xun      | School of Pharmacy, Fujian University of Traditional Chinese Medicine | 2022-2024          | 10                                   |         |
| 2021zyyj60     | Study on process improvement and quality standard improvement of synovial membrane particles in traditional preparation          | Jian-rong wang | Fuzhou Second Hospital                                                | 2022-2024          | 10                                   |         |
| 2021zyyj61     | Impact of ginseng-pepper rotation on ginseng planting and soil environment                                                       | Zhao Li        | Fujian Academy of Traditional Chinese Medicine                        | 2022-2024          | 10                                   |         |
| 2021zyyj62     | She medicine "twelve hours" topical treatment of rheumatoid arthritis anti-inflammatory analgesic efficacy active site screening | Han Jing       | Fujian Academy of Traditional Chinese Medicine                        | 2022-2024          | 10                                   |         |
| 2021zyyj       | Research on TCM resource regionalization in Fujian Province                                                                      | Yang Chengz    | School of Pharmacy, Fujian University of                              | 2022-2024          | 10                                   |         |



|                |                                                                                    |               |                                                                  |           |    |                  |
|----------------|------------------------------------------------------------------------------------|---------------|------------------------------------------------------------------|-----------|----|------------------|
| 63             | based on the data of the fourth National TCM Resource Survey                       | i             | Traditional Chinese Medicine                                     |           |    |                  |
| 2021zyyj<br>64 | The antibacterial activity of different extracts and its preliminary mechanism     | Zhou Chunquan | Fujian Academy of Traditional Chinese Medicine                   | 2022-2024 | 10 |                  |
| 2021zyyj<br>65 | Research and development of compound Jinxilian capsules                            | Huang Defu    | Meng Chao<br>Hepatobiliary Hospital of Fujian Medical University | 2022-2024 | 10 |                  |
| 2021zyyj<br>66 | Research on the development and application of "Shouzheng generation of tea drink" | Zhao-hui li   | Anxi County Hospital of Traditional Chinese Medicine             | 2022-2024 | 10 | Unit self-raised |

eight,

| project number | project name                                                                                                                                       | project leader | Undertake unit                                                                              | Start and end year | Funding fund (RMB ten thousand yuan) | remarks                                                      |
|----------------|----------------------------------------------------------------------------------------------------------------------------------------------------|----------------|---------------------------------------------------------------------------------------------|--------------------|--------------------------------------|--------------------------------------------------------------|
| 2021zyyj 67    | Improvement of sleep by regulating GLU / GABA transmitter imbalance                                                                                | Huang Mei      | School of Pharmacy, Fujian University of Traditional Chinese Medicine                       | 2022-2024          | 10                                   |                                                              |
| 2021zyyj 68    | Huadin interferes with EMT of NPC cells by promoting miR-5688, signaling and tumor stemness to inhibit tumor proliferation, migration and invasion | Liu Chen       | The First Affiliated Hospital of Fujian Medical University                                  | 2022-2024          | 10                                   |                                                              |
| 2021zyyj 69    | Exploring the mechanism of azassol A improving hyperfat-induced BBB damage based on regulation of microglial activation by SIRT 3-NF $\kappa$ B    | Xue xihua      | The Affiliated Rehabilitation Hospital of Fujian University of Traditional Chinese Medicine | 2022-2024          | 10                                   |                                                              |
| 2021zyyj 70    | Silica dioxide carrier enhances the anti-gastric cancer effect and mechanism of xanthonylin B                                                      | Lu Yizhuo      | Zhongshan Hospital affiliated to Xiamen University                                          | 2022-2024          | 10                                   | <b>By Xiamen City, the National Health Commission funded</b> |

|             |                                                                                                                                                                            |                      |                                                                                             |           |    |             |
|-------------|----------------------------------------------------------------------------------------------------------------------------------------------------------------------------|----------------------|---------------------------------------------------------------------------------------------|-----------|----|-------------|
| 2021zyyj 71 | Key CYP 450s genes for the biosynthesis of triterpenoid components in clinical genetics                                                                                    | Lin Wenjin           | And the Fujian Provincial Academy of Medical Sciences                                       | 2022-2024 | 10 | <b>help</b> |
| 2021zyyj 72 | The mechanism of dodder polysaccharide on polycystic ovary syndrome with insulin resistance                                                                                | Ou Yuhang            | The Third People's Hospital Affiliated to Fujian University of Traditional Chinese Medicine | 2022-2024 | 10 |             |
| 2021zyyj 73 | Mechanism of prohematoxylin B in promoting the sensitivity of colon cancer cells to platinum-based chemotherapy                                                            | When the flood clock | The Second Affiliated Hospital of Fujian Medical University                                 | 2022-2024 | 10 |             |
| 2021zyyj 74 | Effects of baicalin on the growth of colorectal cancer cells and the regulation of PNO 1                                                                                   | Chen Xinyu           | Sanming City Hospital of Integrated Traditional Chinese and Western Medicine                | 2022-2024 | 10 |             |
| 2021zyyj 75 | Exploration of the attenuated synergistic mechanism of triptolidoside and curcumin compatibility in rheumatoid arthritis based on IL-17 / NF- $\kappa$ B signaling pathway | Zhang Chaofeng       | The Affiliated Hospital of Putian University                                                | 2022-2024 | 10 |             |

nine,

| project number | project name                                                                                                                                                | project leader   | Undertake unit                                                                        | Start and end year | Funding fund (RMB ten thousand yuan) | remarks                                                           |
|----------------|-------------------------------------------------------------------------------------------------------------------------------------------------------------|------------------|---------------------------------------------------------------------------------------|--------------------|--------------------------------------|-------------------------------------------------------------------|
| 2021zygl 76    | Evaluation and applied research of clinical research interdisciplinary talents in Fujian Grade A Traditional Chinese Medicine Hospital in the new era       | Zhao-lian<br>CAI | The Affiliated People's Hospital of Fujian University of Traditional Chinese Medicine | 2022-2024          | 10                                   |                                                                   |
| 2021zygl 77    | Performance evaluation and analysis of special funds of TCM academic schools in Fujian Province                                                             | Wood-Swallow     | The Affiliated People's Hospital of Fujian University of Traditional Chinese Medicine | 2022-2024          | 10                                   |                                                                   |
| 2021zygl 78    | Investigation on the development status of Traditional Chinese medicine and the development countermeasures in Xiamen tertiary General Hospital             | Zhao Nengjiang   | The First Affiliated Hospital of Xiamen University                                    | 2022-2024          | 10                                   | <b>By Xiamen City, the National Health Commission funded help</b> |
| 2021zygl 79    | Under the "new mode of joint construction of government and hospitals", explore the road of high-quality development of general hospitals and basic Chinese | Zhu Ming         | The First Affiliated Hospital of Fujian Medical University                            | 2022-2024          | 10                                   |                                                                   |

|             |                                                                                                                                                                         |               |                                                                                              |           |    |                                                                   |
|-------------|-------------------------------------------------------------------------------------------------------------------------------------------------------------------------|---------------|----------------------------------------------------------------------------------------------|-----------|----|-------------------------------------------------------------------|
|             | medicine hospitals                                                                                                                                                      |               |                                                                                              |           |    |                                                                   |
| 2021zygl 80 | Research and discussion on the performance evaluation of TCM special fund in Fujian Province                                                                            | Lin Hang      | The Second People's Hospital Affiliated to Fujian University of Traditional Chinese Medicine | 2022-2024 | 10 |                                                                   |
| 2021zygl 81 | Research on the evaluation of improving the efficiency of the use of TCM special funds                                                                                  | Huang Guanwei | Xiamen City Hospital of Traditional Chinese Medicine                                         | 2022-2024 | 10 | <b>By Xiamen City, the National Health Commission funded help</b> |
| 2021zygl 82 | Exploration and practice of the development mode of TCM medicine in general hospitals guided by the coordinated development of traditional Chinese and western medicine | Lin Miaokuo   | Fuzhou Second Hospital                                                                       | 2022-2024 | 4  |                                                                   |
| 2021zygl 83 | Research on TCM development policy in non-TCM hospitals in Fujian Province                                                                                              | Xie Xiaoqing  | The Affiliated People's Hospital of Fujian University of Traditional Chinese Medicine        | 2022-2024 | 10 |                                                                   |
| 2021zygl 84 | Research on the construction of stratified evaluation index system for TCM clinical talents in public hospitals in Fujian Province                                      | Huang Ying    | The Affiliated Rehabilitation Hospital of Fujian University of Traditional Chinese Medicine  | 2022-2024 | 10 |                                                                   |
| 2021zygl 85 | Research on the evaluation index system of TCM talents in the pilot hospitals of                                                                                        | Lin Yu        | Xiamen City Hospital of Traditional                                                          | 2022-2024 | 10 | <b>By Xiamen</b>                                                  |

|             |                                                                                                                                      |               |                                                                                             |           |    |                                                                                      |
|-------------|--------------------------------------------------------------------------------------------------------------------------------------|---------------|---------------------------------------------------------------------------------------------|-----------|----|--------------------------------------------------------------------------------------|
|             | the modern hospital management system                                                                                                |               | Chinese Medicine                                                                            |           |    | <b>City,<br/>the<br/>National<br/>Health<br/>Commissi<br/>on<br/>funded<br/>help</b> |
| 2021zygl 86 | Analysis on the policy implementation of the development of the TCM department of Fujian General Hospital based on the Mi-Horn model | He<br>Chunlan | The Affiliated Rehabilitation Hospital of Fujian University of Traditional Chinese Medicine | 2022-2024 | 10 |                                                                                      |
| 2021zygl 87 | Study on the clinical traditional Chinese physician evaluation model                                                                 | Lin<br>Chao   | The Third People's Hospital Affiliated to Fujian University of Traditional Chinese Medicine | 2022-2024 | 10 |                                                                                      |

# 福建省卫生健康委员会

闽卫中医函〔2021〕969号

## 福建省卫生健康委员会关于下达2021—2024年度 省中医药科研项目计划的通知

各设区市卫健委、平潭综合实验区社会事业局，委直属各单位，福建医科大学、中医药大学及其各附属医院，省中医药科学院：

现将《2021—2024年度福建省中医药科研项目计划》下达给你们，共立项87项，其中省级资助80项、厦门市卫健委资助6项、单位自筹1项。请各课题承担单位根据计划抓紧落实，保证课题的顺利实施。省卫健委委托省中医药科学院开展课题日常管理，请各地各单位参照《福建省卫生健康科技计划项目管理暂行办法》和《福建省卫生健康科技计划项目实施方案》，切实加强项目实施和经费使用的监督管理，为各项目的实施提供支持和保障，确保各项目按计划顺利实施。

附件：2021—2024年度福建省中医药科研项目计划

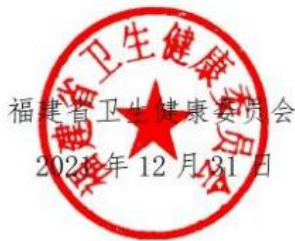

（此件主动公开）
