# Supplementary material for: Chinese acupuncture: A potential treatment for autism rat model via improving synaptic function
Source: PubMed Central journal article supplement — Heliyon. 2024 Aug 29;10(17):e37130. doi: 10.1016/j.heliyon.2024.e37130 (PMC11402746; doi:10.1016/j.heliyon.2024.e37130), 2024-08-29
Supplement: mmc3.pdf [file mmc3.pdf]

# 福建省科学技术厅文件

闽科资〔2021〕35号

---

## 福建省科学技术厅关于下达 2020 年省科技创新联合资金项目计划和经费的通知

各有关单位：

经研究决定，将“PLAG1/Thy-1 信号轴参与肝癌 Regorafenib 耐药的作用机制研究”等 165 个项目列入 2020 年度福建省科技创新联合资金项目计划，资助经费 6182.04 万元。请按照《福建省科技创新联合资金项目管理办法》的要求，认真组织实施。资助经费从科技厅筹集的科技创新联合资金中列支，具体项目和列支科目详见附件。

- 附件：1.2020年福建省科技创新联合资金项目计划与经费表（福建医科大学）
- 2.2020年福建省科技创新联合资金项目计划与经费表（福建医科大学附属协和医院“创双高”）
- 3.2020年福建省科技创新联合资金项目计划与经费表（福建医科大学附属第一医院“创双高”）
- 4.2020年福建省科技创新联合资金项目计划与经费表（福建省妇幼保健院）

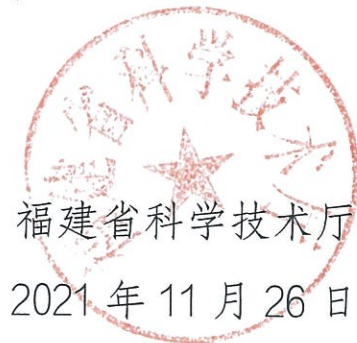

（此件主动公开）

2020年福建省科技创新联合资金项目计划与经费表（福建省妇幼保健院）

| 序号 | 项目编号      | 项目名称                                                                | 项目类型       | 起止年限      | 主管部门       | 承担单位                | 负责人 | 总投资 | 经费（万元） |      | 备注<br>科目编码 |
|----|-----------|---------------------------------------------------------------------|------------|-----------|------------|---------------------|-----|-----|--------|------|------------|
|    |           |                                                                     |            |           |            |                     |     |     | 计划总数   | 已拨累计 |            |
| 1  | 2020Y9133 | 基于肠道菌群——代谢途径研究膳食模式对妊娠期糖尿病的预防作用机制                                    | 科技创新联合资金项目 | 2021/2024 | 福建省卫生健康委员会 | 福建省妇幼保健院（福建省妇女儿童医院） | 江秀敏 | 40  | 0      | 40   | 2060304    |
| 2  | 2020Y9134 | 基于队列研究构建子痫前期新亚分类模型探讨血管形成障碍在子痫前期“胎盘-心脏轴”中的作用及机制                      | 科技创新联合资金项目 | 2021/2025 | 福建省卫生健康委员会 | 福建省妇幼保健院（福建师范大学）    | 颜建英 | 100 | 0      | 100  | 2060304    |
| 3  | 2020Y9135 | 基于染色体微阵列以及二代测序水平的胎儿生长受限遗传学病因及预后研究                                   | 科技创新联合资金项目 | 2021/2024 | 福建省卫生健康委员会 | 福建省妇幼保健院（福建省妇女儿童医院） | 吴小青 | 15  | 0      | 15   | 2060304    |
| 4  | 2020Y9136 | 经皮电刺激对绝经后骨质疏松症OPG/RANKL/RANK信号通路的调控机制研究                             | 科技创新联合资金项目 | 2021/2024 | 福建省卫生健康委员会 | 福建省妇幼保健院（福建省妇女儿童医院） | 郑小花 | 15  | 0      | 15   | 2060304    |
| 5  | 2020Y9137 | 铜暴露致人卵巢颗粒细胞类固醇激素合成障碍的miR-144调控机制研究                                  | 科技创新联合资金项目 | 2021/2024 | 福建省卫生健康委员会 | 福建省妇幼保健院（福建省妇女儿童医院） | 孙艳  | 50  | 0      | 50   | 2060304    |
| 6  | 2020Y9138 | 基于组蛋白乙酰化修饰转录后调控探讨补肾活血方干预肾虚血瘀型多囊卵巢综合征的前瞻性队列研究                        | 科技创新联合资金项目 | 2021/2024 | 福建省卫生健康委员会 | 福建省妇幼保健院（福建省妇女儿童医院） | 许金榜 | 50  | 0      | 50   | 2060304    |
| 7  | 2020Y9139 | 干细胞外泌体通过miR-338靶向HDAC6/NLRP3/IL-1 $\beta$ 通路调控斑马鱼先天性巨结肠相关性小肠结肠炎机制研究 | 科技创新联合资金项目 | 2021/2024 | 福建省卫生健康委员会 | 福建省妇幼保健院（福建省妇女儿童医院） | 刘明坤 | 15  | 0      | 15   | 2060304    |
| 8  | 2020Y9140 | 基于培养体系组学特征谱构建胚胎无创发育潜能评估体系                                           | 科技创新联合资金项目 | 2021/2024 | 福建省卫生健康委员会 | 福建省妇幼保健院（福建省妇女儿童医院） | 黄志清 | 15  | 0      | 15   | 2060304    |
| 9  | 2020Y9141 | 脐带间充质干细胞源性外泌体通过PI3K/AKT通路调控巨噬细胞表型治疗巨结肠相关性小肠结肠炎                      | 科技创新联合资金项目 | 2021/2024 | 福建省卫生健康委员会 | 福建省妇幼保健院（福建省妇女儿童医院） | 王允金 | 15  | 0      | 15   | 2060304    |
| 10 | 2020Y9142 | 内质网应激IRE-1/XBP-1/CHOP通路异常促进早产儿发生发展进程的研究                             | 科技创新联合资金项目 | 2021/2024 | 福建省卫生健康委员会 | 福建省妇幼保健院（福建省妇女儿童医院） | 邱丽茵 | 45  | 0      | 45   | 2060304    |

| 序号 | 项目编号      | 项目名称                                                      | 项目类型       | 起止年限      | 主管部门       | 承担单位                       | 负责人 | 总投资  | 经费(万元) |      |         | 备注<br>科目编码 |
|----|-----------|-----------------------------------------------------------|------------|-----------|------------|----------------------------|-----|------|--------|------|---------|------------|
|    |           |                                                           |            |           |            |                            |     |      | 计划总数   | 已拨累计 | 当年      |            |
| 11 | 2020Y9143 | ACSL4 mRNA m6A修饰调控铁死亡在胆红素致神经细胞损伤中的作用及机制                   | 科技创新联合基金项目 | 2021/2024 | 福建省卫生健康委员会 | 福建省妇幼保健院(福建省妇幼保健院)         | 周进福 | 14.5 | 0      | 14.5 | 2060304 |            |
| 12 | 2020Y9144 | P2X7R介导NLRP3活化在自闭症发生发展的作用及可能表观遗传机制研究                      | 科技创新联合基金项目 | 2021/2024 | 福建省卫生健康委员会 | 福建省妇幼保健院(福建省妇幼保健院)         | 苏跃青 | 50   | 0      | 50   | 2060304 |            |
| 13 | 2020Y9145 | “靳三针”调控催产素及其受体在改善孤独症重复刻板行为中的机制研究                          | 科技创新联合基金项目 | 2021/2024 | 福建省卫生健康委员会 | 福建省妇幼保健院(福建省妇幼保健院)         | 黄龙生 | 15   | 0      | 15   | 2060304 |            |
| 14 | 2020Y9146 | 多参数磁共振成像与影像学在子宫内肿瘤分子分型的相关性研究                              | 科技创新联合基金项目 | 2021/2024 | 福建省卫生健康委员会 | 福建省妇幼保健院(福建省妇幼保健院)         | 方如旗 | 10.5 | 0      | 10.5 | 2060304 |            |
| 15 | 2020Y9147 | LncRNA XIIST/miR-139-5p/SLC7A11通过铁死亡途径调控宫颈癌恶性生物学行为的分子机制研究 | 科技创新联合基金项目 | 2021/2024 | 福建省卫生健康委员会 | 福建省妇幼保健院(福建省妇幼保健院)         | 林英英 | 12   | 0      | 12   | 2060304 |            |
| 16 | 2020Y9148 | 基于队列的阴道微生物组学和代谢组学与早产的关系研究                                 | 科技创新联合基金项目 | 2021/2024 | 福建省卫生健康委员会 | 福建省妇幼保健院(福建省妇幼保健院)         | 潘勉  | 50   | 0      | 50   | 2060304 |            |
| 17 | 2020Y9149 | 先天性心脏病胎儿分子遗传学诊断及分子机制研究                                    | 科技创新联合基金项目 | 2021/2024 | 福建省卫生健康委员会 | 福建省妇幼保健院(福建省妇幼保健院)         | 薛会丽 | 15   | 0      | 15   | 2060304 |            |
| 18 | 2020Y9150 | 地中海贫血对女性妊娠及婴幼儿早期生长发育影响的前瞻性队列研究                            | 科技创新联合基金项目 | 2021/2024 | 福建省卫生健康委员会 | 福建省妇幼保健院(福建省妇幼保健院)         | 赵婉彤 | 10   | 0      | 10   | 2060304 |            |
| 19 | 2020Y9151 | 基于光电化学的多模式联合检测在卵巢癌早期诊断中的价值研究                              | 科技创新联合基金项目 | 2021/2024 | 福建省卫生健康委员会 | 福建省妇幼保健院(福建省妇幼保健院)         | 张书培 | 15   | 0      | 15   | 2060304 |            |
| 20 | 2020Y9152 | miRNA-125b介导小豆蔻明降低ErbB2表达抑制卵巢癌增殖和转移的研究                    | 科技创新联合基金项目 | 2021/2024 | 福建省卫生健康委员会 | 福建省妇幼保健院(福建省妇幼保健院)         | 牛培广 | 15   | 0      | 15   | 2060304 |            |
| 21 | 2020Y9153 | miR-34a探讨补脾胃泻阴火升阳汤抑制脾虚湿盛型子宫颈癌转移的研究                        | 科技创新联合基金项目 | 2021/2024 | 福建省卫生健康委员会 | 福建省妇幼保健院(福建省妇幼保健院); 福建省立医院 | 邱佳慧 | 15   | 0      | 15   | 2060304 |            |
| 22 | 2020Y9154 | 蜕膜NK细胞在母胎界面CMV感染中的作用及机制研究                                 | 科技创新联合基金项目 | 2021/2024 | 福建省卫生健康委员会 | 福建省妇幼保健院(福建省妇幼保健院)         | 林晓倩 | 15   | 0      | 15   | 2060304 |            |
| 23 | 2020Y9155 | cav-1/WNT5/β-Catenin轴诱导人绒毛膜癌细胞化学耐药性的机制及临床队列研究             | 科技创新联合基金项目 | 2021/2024 | 福建省卫生健康委员会 | 福建省妇幼保健院(福建省妇幼保健院)         | 吴齐斌 | 40   | 0      | 40   | 2060304 |            |

| 序号 | 项目编号      | 项目名称                                                         | 项目类型       | 起止年限      | 主管部门       | 承担单位                             | 负责人 | 总投资     | 经费(万元) |        |         | 备注<br>科目编码 |
|----|-----------|--------------------------------------------------------------|------------|-----------|------------|----------------------------------|-----|---------|--------|--------|---------|------------|
|    |           |                                                              |            |           |            |                                  |     |         | 计划总数   | 已拨累计   | 当年      |            |
| 24 | 2020Y9156 | 先天性心脏病胎儿脑发育的产前超声队列研究                                         | 科技创新联合基金项目 | 2021/2024 | 福建省卫生健康委员会 | 福建省妇幼保健院(福建省妇幼保健院)               | 翁宗杰 | 10      | 0      | 10     | 2060304 |            |
| 25 | 2020Y9157 | 福建省儿童发育性髋关节发育不良早期筛查策略与病因学队列研究                                | 科技创新联合基金项目 | 2021/2024 | 福建省卫生健康委员会 | 福建省妇幼保健院(福建省妇幼保健院)               | 陈辉  | 15      | 0      | 15     | 2060304 |            |
| 26 | 2020Y9158 | NUP160基因突变致SRNS的发病机制和治疗研究                                    | 科技创新联合基金项目 | 2021/2025 | 福建省卫生健康委员会 | 福建省妇幼保健院(福建省妇幼保健院)               | 余自华 | 100     | 0      | 100    | 2060304 |            |
| 27 | 2020Y9159 | 胎儿消化系统畸形的分子遗传学诊断与机制研究                                        | 科技创新联合基金项目 | 2021/2024 | 福建省卫生健康委员会 | 福建省妇幼保健院(福建省妇幼保健院)               | 林娜  | 45      | 0      | 45     | 2060304 |            |
| 28 | 2020Y9160 | PGC-1 $\alpha$ /ERR $\alpha$ 信号轴介导的脂代谢重编程调控膜脂结构驱动子宫内膜癌细胞侵袭转移 | 科技创新联合基金项目 | 2021/2025 | 福建省卫生健康委员会 | 福建省妇幼保健院(福建省妇幼保健院)               | 孙蓬明 | 100     | 0      | 100    | 2060304 |            |
| 29 | 2020Y9161 | miR调控HIF-1 $\alpha$ /VEGF信号通路在子痫前期中的作用及机制研究                  | 科技创新联合基金项目 | 2021/2024 | 福建省卫生健康委员会 | 福建省妇幼保健院(福建省妇幼保健院)               | 徐霞  | 15      | 0      | 15     | 2060304 |            |
| 30 | 2020Y9162 | 吗啉管绿杂化介孔硅用于妊娠滋养细胞肿瘤靶向光疗/化疗协同治疗应用                             | 科技创新联合基金项目 | 2021/2024 | 福建省卫生健康委员会 | 福建省妇幼保健院(福建省妇幼保健院)               | 高乔  | 13      | 0      | 13     | 2060304 |            |
| 31 | 2020Y9163 | 肠道菌群代谢产物短链脂肪酸与子痫前期的相关性研究                                     | 科技创新联合基金项目 | 2021/2024 | 福建省卫生健康委员会 | 福建省妇幼保健院(福建省妇幼保健院)               | 蒋玲玲 | 10      | 0      | 10     | 2060304 |            |
| 32 | 2020Y9164 | 靶向E6/E7蛋白纳米探针制备及其在HPV病毒感染所致的下生殖道病变筛查诊断中的应用                   | 科技创新联合基金项目 | 2021/2024 | 福建省卫生健康委员会 | 福建省妇幼保健院(福建省妇幼保健院); 中科院福建物质结构研究所 | 蔡良知 | 41.5    | 0      | 40     | 2060304 |            |
| 33 | 2020Y9165 | 妊娠期糖尿病胎盘组织环状RNA表达谱分析及初步应用研究                                  | 科技创新联合基金项目 | 2021/2024 | 福建省卫生健康委员会 | 福建省妇幼保健院(福建省妇幼保健院)               | 修晓燕 | 19.24   | 0      | 14.74  | 2060304 |            |
| 合计 |           |                                                              |            |           |            |                                  |     | 1005.74 | 999.74 | 999.74 |         |            |

---

福建省科学技术厅办公室

2021年11月26日印发

---

Documents of Fujian  
Provincial  
Department of  
Science and  
Technology

No. 35, 2021

---

# Notice of Fujian Provincial Department of Science and Technology on the Issuance of the Plan and Funds of the provincial Science and Technology Innovation Joint Fund Project in 2020

All relevant units:

After research, 165 projects including "PLAG 1 / Thy-1 signal axis involved in the action mechanism of Regorafenib resistance in liver cancer" were included in the 2020 Fujian Provincial Science and Technology Innovation Joint Fund Project Plan, with a funding of 61,820,400 yuan. Please conscientiously organize the implementation in accordance with the requirements of Fujian Provincial Science and Technology Innovation Joint Fund Project Management Measures. The funding shall be allocated from the joint funds for science and technology innovation raised by the Department of Science and Technology, and see the annex for specific items and items.



Appendix: 1. 2020 Fujian Provincial Science and Technology Innovation Joint Fund Project Plan and Funding Table (Fujian Medical University)

2. 2020 Fujian Science and Technology Innovation Joint Fund Project Plan and Funding ("Create Double High School" of Union Hospital Affiliated to Fujian Medical University)

3. Plan and Funding Table of Fujian Provincial Science and Technology Innovation Joint Fund Project in 2020 ("Create Double High School" of the First Affiliated Hospital of Fujian Medical University)

4. Plan and Funding of Fujian Science and Technology Innovation Joint Fund Project in 2020 (Fujian Maternal and Child Health Hospital)

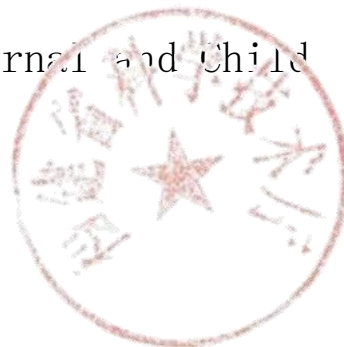

Fujian Provincial  
Department of Science  
and Technology

On November  
26, 2021

(This document is voluntarily disclosed.)

### Fujian Provincial Science and Technology Innovation Joint Fund Project Plan and Funding Table in 2020 (Fujian Provincial Maternal and Child Health Care Hospital)

| order number | project number | project name                                                                                                                                                                                                 | Project type                                                         | Start and end years | competent department                | Undertake unit                                                                                                                     | leading official | total investment | Funds (ten thousand yuan) |                               |                | remarks Subject coding |
|--------------|----------------|--------------------------------------------------------------------------------------------------------------------------------------------------------------------------------------------------------------|----------------------------------------------------------------------|---------------------|-------------------------------------|------------------------------------------------------------------------------------------------------------------------------------|------------------|------------------|---------------------------|-------------------------------|----------------|------------------------|
|              |                |                                                                                                                                                                                                              |                                                                      |                     |                                     |                                                                                                                                    |                  |                  | Total number of plans     | Cumulative has been allocated | in those years |                        |
| 1            | 2020Y9133      | Based on the metabolic pathway of intestinal flora, the prevention mechanism of dietary pattern on gestational diabetes                                                                                      | Science and technology innovation association, joint capital project | 2021/2024           | Fujian Provincial Health Commission | Fujian Maternal and Child Health Hospital (Fujian Women and Children's Hospital)                                                   | Jiang Xiumin     | 40               | 40                        | 0                             | 40             | 2060304                |
| 2            | 2020Y9134      | Based on the cohort study, preeclampsia was constructed, and the new subclassification model explored the role and mechanism of vascular formation and disorder in the "placenta-heart axis" of preeclampsia | Science and technology innovation association, joint capital project | 2021/2025           | Fujian Provincial Health Commission | Fujian Provincial Maternal and Child Health Hospital (Fu, Jian Provincial Women and Children's Hospital): Fujian Normal University | Yan Jianying     | 100              | 100                       | 0                             | 100            | 2060304                |
| 3            | 2020Y9135      | Study on the genetic etiology and prognosis of fetal growth restriction based on chromosomal microarray and second generation                                                                                | Science and technology innovation association, joint capital project | 2021/2024           | Fujian Provincial Health Commission | Fujian Maternal and Child Health Hospital (Fujian Women and Children's Hospital)                                                   | Wu Xiaoping      | 15               | 15                        | 0                             | 15             | 2060304                |
| 4            | 2020Y9136      | Percutaneous electrical stimulation on postmenopausal osteoporosis OPG /                                                                                                                                     | Science and technology                                               | 2021/2024           | Fujian Provincial Health            | Fujian Maternal and Child Health Hospital (Fujian Women and                                                                        | Zheng Xiaohua    | 15               | 15                        | 0                             | 15             | 2060304                |

|   |           |                                                                                                                                 |                                                                      |           |                                     |                                                                                  |                |    |    |   |    |         |
|---|-----------|---------------------------------------------------------------------------------------------------------------------------------|----------------------------------------------------------------------|-----------|-------------------------------------|----------------------------------------------------------------------------------|----------------|----|----|---|----|---------|
|   |           | RANKL / RANK letters<br>The regulatory mechanism of pathway No                                                                  | innovation association, joint capital project                        |           | Commission                          | Children's Hospital)                                                             |                |    |    |   |    |         |
| 5 | 2020Y9137 | Regulatory mechanism of miR-144 in steroid hormone synthesis disorder in ovarian granulosa cells after copper exposure          | Science and technology innovation association, joint capital project | 2021/2024 | Fujian Provincial Health Commission | Fujian Maternal and Child Health Hospital (Fujian Women and Children's Hospital) | Sun Yan        | 50 | 50 | 0 | 50 | 2060304 |
| 6 | 2020Y9138 | A prospective cohort study based on transcription based on histone acetylation, kidney deficiency and blood stasis              | Science and technology innovation association, joint capital project | 2021/2024 | Fujian Provincial Health Commission | Fujian Maternal and Child Health Hospital (Fujian Women and Children's Hospital) | Xu jinbang     | 50 | 50 | 0 | 50 | 2060304 |
| 7 | 2020Y9139 | Stem cell exosomes targeted the mechanism of HDAC 6 / NLRP 3 / IL-1 $\beta$ pathway by miR-338                                  | Science and technology innovation association, joint capital project | 2021/2024 | Fujian Provincial Health Commission | Fujian Maternal and Child Health Hospital (Fujian Women and Children's Hospital) | Liu Mingkun    | 15 | 15 | 0 | 15 | 2060304 |
| 8 | 2020Y9140 | Based on the characteristic structure of culture system, a non-invasive development potential assessment system was established | Science and technology innovation association, joint capital project | 2021/2024 | Fujian Provincial Health Commission | Fujian Maternal and Child Health Hospital (Fujian Women and Children's Hospital) | Zhi-qing huang | 15 | 15 | 0 | 15 | 2060304 |
| 9 | 2020Y9141 | Umbilical cord mesenchymal stem cell-derived exosomes regulate macrophage phenotype through the                                 | Science and technology innovation                                    | 2021/2024 | Fujian Provincial Health Commission | Fujian Maternal and Child Health Hospital (Fujian Women and                      | Wang Yunjin    | 15 | 15 | 0 | 15 | 2060304 |

|    |           |                                                                                                       |                                                                      |           |                                     |                                                                                  |            |    |    |   |    |         |
|----|-----------|-------------------------------------------------------------------------------------------------------|----------------------------------------------------------------------|-----------|-------------------------------------|----------------------------------------------------------------------------------|------------|----|----|---|----|---------|
|    |           | PI3K / AKT pathway to treat megacolon-associated enterocolitis                                        | association, joint capital project                                   |           |                                     | Children's Hospital)                                                             |            |    |    |   |    |         |
| 10 | 2020Y9142 | ER Stress IRE-1 / XBP-1 / abnormalities of the CHOP pathway promotes the progression of preterm birth | Science and technology innovation association, joint capital project | 2021/2024 | Fujian Provincial Health Commission | Fujian Maternal and Child Health Hospital (Fujian Women and Children's Hospital) | Li-yin qiu | 45 | 45 | 0 | 45 | 2060304 |

| order number | project number | project name                                                                                                                                    | Project type                                                         | Start and end years | competent department                | Undertake unit                                                                   | leading official  | total investment | Funds (ten thousand yuan) |                               |                | remarks Subject coding |
|--------------|----------------|-------------------------------------------------------------------------------------------------------------------------------------------------|----------------------------------------------------------------------|---------------------|-------------------------------------|----------------------------------------------------------------------------------|-------------------|------------------|---------------------------|-------------------------------|----------------|------------------------|
|              |                |                                                                                                                                                 |                                                                      |                     |                                     |                                                                                  |                   |                  | Total number of plans     | Cumulative has been allocated | in those years |                        |
| 11           | 2020Y9143      | Regulation of ACSL4 mRNA m6A modification<br>Role and mechanism of iron death in bilirubin-induced nerve cell injury                            | Science and technology innovation association, joint capital project | 2021/2024           | Fujian Provincial Health Commission | Fujian Maternal and Child Health Hospital (Fujian Women and Children's Hospital) | Zhou Jinfu        | 14.5             | 14.5                      | 0                             | 14.5           | 2060304                |
| 12           | 2020Y9144      | Role and the possible epigenetic mechanisms of P2X7R mediation of NLRP 3 activation in the development and progression of autism                | Science and technology innovation association, joint capital project | 2021/2024           | Fujian Provincial Health Commission | Fujian Maternal and Child Health Hospital (Fujian Women and Children's Hospital) | Su Yueqing        | 50               | 50                        | 0                             | 50             | 2060304                |
| 13           | 2020Y9145      | The mechanism of regulating oxytocin and its receptors in improving repetitive and stereotyped behaviors in autism                              | Science and technology innovation association, joint capital project | 2021/2024           | Fujian Provincial Health Commission | Fujian Maternal and Child Health Hospital (Fujian Women and Children's Hospital) | Huang Longsheng   | 15               | 15                        | 0                             | 15             | 2060304                |
| 14           | 2020Y9146      | Correlation between multiparametric magnetic resonance and imaging omics and molecular classification of daughter-related endometrial carcinoma | Science and technology innovation association, joint capital project | 2021/2024           | Fujian Provincial Health Commission | Fujian Maternal and Child Health Hospital (Fujian Women and Children's Hospital) | Fang such as flag | 10.5             | 10.5                      | 0                             | 10.5           | 2060304                |
| 15           | 2020Y9147      | LncRNA XISTmiR-139-5pSLC7A11 regulates the malignant biological behavior of cervical                                                            | Science and technology                                               | 2021/2024           | Fujian Provincial Health            | Fujian Maternal and Child Health Hospital (Fujian                                | Lin Yingying      | 12               | 12                        | 0                             | 12             | 2060304                |

|    |           |                                                                                                             |                                                                      |           |                                     |                                                                                  |               |    |    |   |    |         |
|----|-----------|-------------------------------------------------------------------------------------------------------------|----------------------------------------------------------------------|-----------|-------------------------------------|----------------------------------------------------------------------------------|---------------|----|----|---|----|---------|
|    |           | cancer through the iron death pathway<br>The molecular mechanism of the study                               | innovation association, joint capital project                        |           | Commission                          | Women and Children's Hospital)                                                   |               |    |    |   |    |         |
| 16 | 2020Y9148 | Cohort-based studies of the vaginal microbiome, and metabolomics versus preterm birth                       | Science and technology innovation association, joint capital project | 2021/2024 | Fujian Provincial Health Commission | Fujian Maternal and Child Health Hospital (Fujian Women and Children's Hospital) | Pan Mian      | 50 | 50 | 0 | 50 | 2060304 |
| 17 | 2020Y9149 | Diagnosis and molecular mechanism of congenital heart disease                                               | Science and technology innovation joint funding project              | 2021/2024 | Fujian Provincial Health Commission | Fujian Maternal and Child Health Hospital (Fujian Women and Children's Hospital) | Xue Huili     | 15 | 15 | 0 | 15 | 2060304 |
| 18 | 2020Y9150 | A late cohort study on the effects of thalassemia on female pregnancy and infant and early childhood growth | Science and technology innovation association, joint capital project | 2021/2024 | Fujian Provincial Health Commission | Fujian Maternal and Child Health Hospital (Fujian Women and Children's Hospital) | Wan-tong zhao | 10 | 10 | 0 | 10 | 2060304 |
| 19 | 2020Y9151 | Research on the value of detection in the early diagnosis of ovarian cancer                                 | Science and technology innovation association, joint capital project | 2021/2024 | Fujian Provincial Health Commission | Fujian Maternal and Child Health Hospital (Fujian Women and Children's Hospital) | Zhang Shupe   | 15 | 15 | 0 | 15 | 2060304 |
| 20 | 2020Y9152 | miRNA-125b mediated ErbB 2 expression of cardamom to inhibit ovarian cancer, proliferation and metastasis   | Science and technology innovation association, joint                 | 2021/2024 | Fujian Provincial Health Commission | Fujian Maternal and Child Health Hospital (Fujian Women and Children's Hospital) | Niu Peiguang  | 15 | 15 | 0 | 15 | 2060304 |

|    |           |                                                                                                                                                              |                                                                      |           |                                     |                                                                                                                                      |               |    |    |   |    |         |
|----|-----------|--------------------------------------------------------------------------------------------------------------------------------------------------------------|----------------------------------------------------------------------|-----------|-------------------------------------|--------------------------------------------------------------------------------------------------------------------------------------|---------------|----|----|---|----|---------|
|    |           |                                                                                                                                                              | capital project                                                      |           |                                     |                                                                                                                                      |               |    |    |   |    |         |
| 21 | 2020Y9153 | Based on the regulation of HSPA 9 and miR-34a by miPEP 133 to investigate the inhibition of the metastasis of spleen deficiency and wet-type cervical cancer | Science and technology innovation association, joint capital project | 2021/2024 | Fujian Provincial Health Commission | Fujian Provincial Maternal and Child Health Hospital (Fu, Jian Provincial Women and Children's Hospital); Fujian Provincial Hospital | Qiu Jiahui    | 15 | 15 | 0 | 15 | 2060304 |
| 22 | 2020Y9154 | Decidual NK cells at the maternal-fetal interface<br>Role and mechanism research in CMV infection                                                            | Science and technology innovation union Joint capital project        | 2021/2024 | Fujian Provincial Health Commission | Fujian Maternal and Child Health Hospital (Fujian Women and Children's Hospital)                                                     | Xiao-qian Lin | 15 | 15 | 0 | 15 | 2060304 |
| 23 | 2020Y9155 | Mechanisms and clinical cohort studies of the cav-1 / WNT 6 / $\beta$ -Catenin axis-induced chemoresistance in human choriocarcinoma cells                   | Science and technology innovation association, joint capital project | 2021/2024 | Fujian Provincial Health Commission | Fujian Maternal and Child Health Hospital (Fujian Women and Children's Hospital)                                                     | Wu Qibin      | 40 | 40 | 0 | 40 | 2060304 |



| order number | project number | project name                                                                                                                                           | Project type                                                         | Start and end years | competent department                | Undertake unit                                                                   | leading official | total investment | Funds (ten thousand yuan) |                               |                | remarks Subject coding |
|--------------|----------------|--------------------------------------------------------------------------------------------------------------------------------------------------------|----------------------------------------------------------------------|---------------------|-------------------------------------|----------------------------------------------------------------------------------|------------------|------------------|---------------------------|-------------------------------|----------------|------------------------|
|              |                |                                                                                                                                                        |                                                                      |                     |                                     |                                                                                  |                  |                  | Total number of plans     | Cumulative has been allocated | in those years |                        |
| 24           | 2020Y9156      | Prenatal ultrasound cohort study of brain development in fetuses with congenital heart disease                                                         | Science and technology innovation association, joint capital project | 2021/2024           | Fujian Provincial Health Commission | Fujian Maternal and Child Health Hospital (Fujian Women and Children's Hospital) | Weng Zongjie     | 10               | 10                        | 0                             | 10             | 2060304                |
| 25           | 2020Y9157      | Cohort study on early screening strategy and etiology of developmental hip joints in children in Fujian Province                                       | Science and technology innovation association, joint capital project | 2021/2024           | Fujian Provincial Health Commission | Fujian Maternal and Child Health Hospital (Fujian Women and Children's Hospital) | Chen Hui         | 15               | 15                        | 0                             | 15             | 2060304                |
| 26           | 2020Y9158      | The pathogenesis and treatment of SRNS caused by NUP160 gene mutation                                                                                  | Science and technology innovation association, joint capital project | 2021/2025           | Fujian Provincial Health Commission | Fujian Maternal and Child Health Hospital (Fujian Women and Children's Hospital) | Yu zihua         | 100              | 100                       | 0                             | 100            | 2060304                |
| 27           | 2020Y9159      | Molecular genetic diagnosis and mechanism study of fetal digestive system malformation                                                                 | Science and technology innovation association, joint capital project | 2021/2024           | Fujian Provincial Health Commission | Fujian Maternal and Child Health Hospital (Fujian Women and Children's Hospital) | Lin na           | 45               | 45                        | 0                             | 45             | 2060304                |
| 28           | 2020Y9160      | Reprogramming of lipid metabolism mediated by the PGC-1 $\alpha$ / ERR $\alpha$ signaling axis regulates membrane lipid knots, which sterically drives | Science and technology innovation association, joint                 | 2021/2025           | Fujian Provincial Health Commission | Fujian Maternal and Child Health Hospital (Fujian Women and Children's Hospital) | Sun Pengming     | 100              | 100                       | 0                             | 100            | 2060304                |

|    |           |                                                                                                                                                                     |                                                                      |           |                                     |                                                                                                                                                               |                 |       |       |   |       |         |
|----|-----------|---------------------------------------------------------------------------------------------------------------------------------------------------------------------|----------------------------------------------------------------------|-----------|-------------------------------------|---------------------------------------------------------------------------------------------------------------------------------------------------------------|-----------------|-------|-------|---|-------|---------|
|    |           | invasion and metastasis of endometrial cancer cells                                                                                                                 | capital project                                                      |           |                                     |                                                                                                                                                               |                 |       |       |   |       |         |
| 29 | 2020Y9161 | Role and mechanism of FtMt in regulating HIF1 $\alpha$ / VEGF signaling pathway in preeclampsia                                                                     | Science and technology innovation association, joint capital project | 2021/2024 | Fujian Provincial Health Commission | Fujian Maternal and Child Health Hospital (Fujian Women and Children's Hospital)                                                                              | Xu Xia          | 15    | 15    | 0 | 15    | 2060304 |
| 30 | 2020Y9162 | Daoqing green hybrid mesoporous silicon for targeted phototherapy in gestational trophoblastic tumors                                                               | Science and technology innovation association, joint capital project | 2021/2024 | Fujian Provincial Health Commission | Fujian Maternal and Child Health Hospital (Fujian Women and Children's Hospital)                                                                              | Gao Qiao        | 13    | 13    | 0 | 13    | 2060304 |
| 31 | 2020Y9163 | Correlation of short-chain fat, acid and preeclampsia                                                                                                               | Science and technology innovation union Joint capital project        | 2021/2024 | Fujian Provincial Health Commission | Fujian Maternal and Child Health Hospital (Fujian Women and Children's Hospital)                                                                              | Ling-ling jiang | 10    | 10    | 0 | 10    | 2060304 |
| 32 | 2020Y9164 | Preparation of a targeted E6 / E7 protein nanoprobe and its application in the screening and diagnosis of lower genital tract lesions caused by HPV virus infection | Science and technology innovation association, joint capital project | 2021/2024 | Fujian Provincial Health Commission | Fujian Provincial Maternal and Child Health Care Hospital (Fu, Jian Provincial Women and Children's Hospital); Zhongke Fujian Institute of Material Structure | CAI consciencie | 41.5  | 40    | 0 | 40    | 2060304 |
| 33 | 2020Y9165 | Circular RNA expression profiling and preliminary application of diabetic placental tissue during pregnancy                                                         | Science and technology innovation association, joint                 | 2021/2024 | Fujian Provincial Health Commission | Fujian Maternal and Child Health Hospital (Fujian Women and Children's Hospital)                                                                              | Xiu Xiaoyan     | 19.24 | 14.74 | 0 | 14.74 | 2060304 |

|           |  |  |                    |  |  |  |  |         |        |   |        |  |
|-----------|--|--|--------------------|--|--|--|--|---------|--------|---|--------|--|
|           |  |  | capital<br>project |  |  |  |  |         |        |   |        |  |
| amount to |  |  |                    |  |  |  |  | 1005.74 | 999.74 | 0 | 999.74 |  |

---

Issued by the Office of Fujian Provincial Department  
of Science and Technology on November 26, 2021
