# Supplementary material for: Chinese acupuncture: A potential treatment for autism rat model via improving synaptic function
Source: PubMed Central journal article supplement — Heliyon. 2024 Aug 29;10(17):e37130. doi: 10.1016/j.heliyon.2024.e37130 (PMC11402746; doi:10.1016/j.heliyon.2024.e37130), 2024-08-29
Supplement: mmc4.pdf [file mmc4.pdf]

# 福建省财政厅 福建省科学技术厅 文件

闽财指〔2022〕599号

---

## 福建省财政厅 福建省科学技术厅关于安排 2022年度省自然科学基金等科技计划 项目经费（省级）的通知

省直有关单位：

根据《福建省财政厅 福建省科学技术厅关于印发〈省级科技创新专项资金管理办法〉的通知》（闽财教〔2021〕28号）和《福建省科学技术厅关于印发〈福建省科技计划项目管理办法〉的通知》（闽科计〔2019〕9号）等有关规定，经研究决定，将“数据驱动的团簇结构预测与演化机制研究”等673项列入科技计划项目。

现将年度科学技术经费下达你们,具体项目经费及科目详见附件。

请按照专项资金管理办法等有关规定执行,专款专用,加强对经费的使用和监督管理。请做好绩效跟踪管理,切实提高财政资金使用效益。

- 附件: 1. 2022年福建省自然科学基金(非联合)项目计划与经费表(省级)
2. 2022年福建省自然科学基金(高校联合、农科联合)项目计划与经费表(省级)
3. 2022年福建省中科院 STS 计划配套(院省合作、院省合作平台)项目计划与经费表(省级)
4. 专项资金绩效目标表

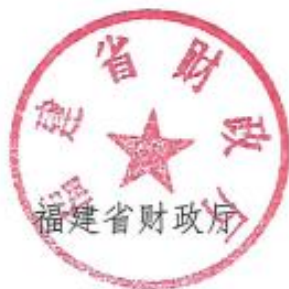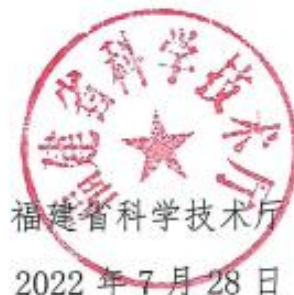

信息公开类型: 主动公开

福建省财政厅办公室

2022年7月29日印发

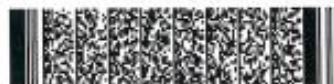

| 序号  | 项目编号       | 项目名称                                                   | 项目类型         | 起止年限      | 主管部门    | 牵头承担单位          | 合作单位 | 负责人 | 资助经费(万元) | 政府预算支出经济分类科目 | 部门预算支出经济分类科目 | 支出功能分类科目 |
|-----|------------|--------------------------------------------------------|--------------|-----------|---------|-----------------|------|-----|----------|--------------|--------------|----------|
| 113 | 2022J01357 | 能量水平调控番石榴果实冷害及其与呼吸途径、糖代谢的关系                            | 自然科学基金项目(面上) | 2022/2025 | 福建中医药大学 | 福建中医药大学药学院      |      | 孔祥佳 | 7        | 50502        | 39999        | 2060203  |
| 114 | 2022J01359 | 纳米抗体-磁性荧光微球探针免疫层析技术现场检测中药材中黄曲霉毒素                       | 自然科学基金项目(面上) | 2022/2025 | 福建中医药大学 | 福建中医药大学药学院      |      | 余宇燕 | 7        | 50502        | 39999        | 2060203  |
| 115 | 2022J01361 | 基于肠道菌群-胆汁酸-FXR轴的代谢综合征证分子机制研究                           | 自然科学基金项目(面上) | 2022/2025 | 福建中医药大学 | 福建中医药大学中医学院     |      | 陈梅妹 | 7        | 50502        | 39999        | 2060203  |
| 116 | 2022J01362 | 基于Rab7相关EAL通路异常研究神经元自噬在“肝郁”加速海马老化的作用及机制                | 自然科学基金项目(面上) | 2022/2025 | 福建中医药大学 | 福建中医药大学中医学院     |      | 龚琳  | 7        | 50502        | 39999        | 2060203  |
| 117 | 2022J01363 | “新三针”调控催产素及其受体改善SHANK3小鼠社会交往障碍的机制研究                    | 自然科学基金项目(面上) | 2022/2025 | 福建中医药大学 | 福建中医药大学中医学院     |      | 康洁  | 7        | 50502        | 39999        | 2060203  |
| 118 | 2022J01364 | 基于内质网应激研究皂角一仙胶调控大鼠软骨细胞内质网稳态的软骨保护作用机制                   | 自然科学基金项目(面上) | 2022/2025 | 福建中医药大学 | 福建中医药大学中医学院     |      | 耿秋东 | 7        | 50502        | 39999        | 2060203  |
| 119 | 2022J01365 | miR-34a对艾灸延缓雌性初衰大鼠皮肤老化的作用机制研究                          | 自然科学基金项目(面上) | 2022/2025 | 福建中医药大学 | 福建中医药大学针灸学院     |      | 张苗  | 7        | 50502        | 39999        | 2060203  |
| 120 | 2022J01366 | 探究对胥胝体阻断的自闭症大鼠中枢BDNF、TrkB表达的多脑区联动效应机制研究                | 自然科学基金项目(面上) | 2022/2025 | 福建中医药大学 | 福建中医药大学针灸学院     |      | 林丽莉 | 7        | 50502        | 39999        | 2060203  |
| 121 | 2022J01367 | 基于谷氨酸诱导HT22细胞铁死亡探讨小续命汤治疗阿尔茨海默病的作用研究                    | 自然科学基金项目(面上) | 2022/2025 | 福建中医药大学 | 福建中医药大学中西医结合研究院 |      | 毛敬洁 | 7        | 50502        | 39999        | 2060203  |
| 122 | 2022J01369 | 基于钙信号和炎症因子研究莲心碱调控血管平滑肌功能防治高血压的作用机制                     | 自然科学基金项目(面上) | 2022/2025 | 福建中医药大学 | 福建中医药大学中西医结合研究院 |      | 陈达鑫 | 7        | 50502        | 39999        | 2060203  |
| 123 | 2022J01370 | 从竞争性内源RNA调控角度探讨乌头汤介导IRE1 $\alpha$ /XBP1途径延缓骨关节炎软骨退变的机制 | 自然科学基金项目(面上) | 2022/2025 | 福建中医药大学 | 福建中医药大学中西医结合研究院 |      | 付长龙 | 7        | 50502        | 39999        | 2060203  |
